# Supplementary figures and images for: Active Wnt signaling in response to cardiac injury
Source: PubMed Central journal article supplement — Basic Res Cardiol. 2010 Apr 7;105(5):631–41. doi: 10.1007/s00395-010-0100-9 (PMC2916122; doi:10.1007/s00395-010-0100-9), 2010-04-07

$\beta$ -gal  
hoechst

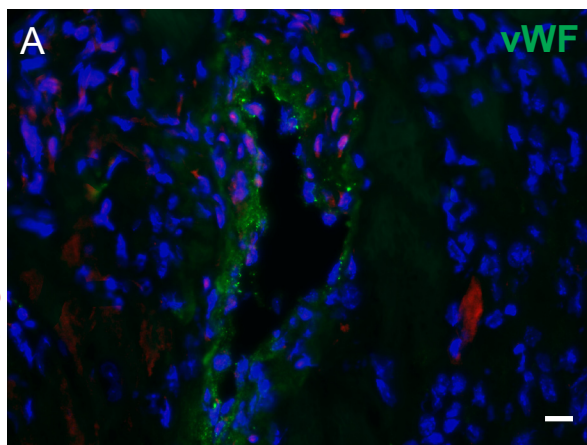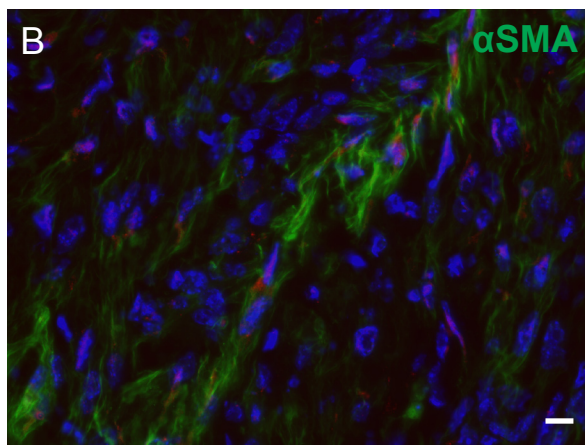

$\beta$ -gal  
hoechst

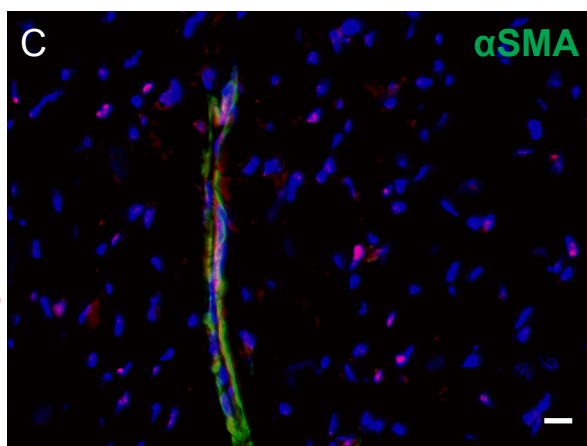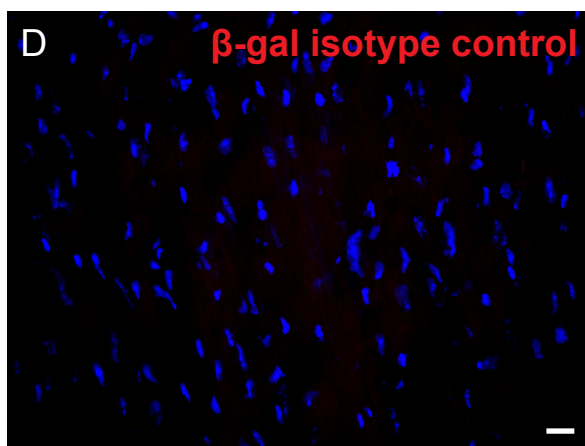

Supplement: 395_2010_100_MOESM2_ESM.pdf [file 395_2010_100_MOESM2_ESM.pdf]
