# Supplementary figures and images for: Active Wnt signaling in response to cardiac injury
Source: Springer Nature journal article supplement (doi:10.1007/s00395-010-0100-9), 2010-04-07

NaCl (20mM)

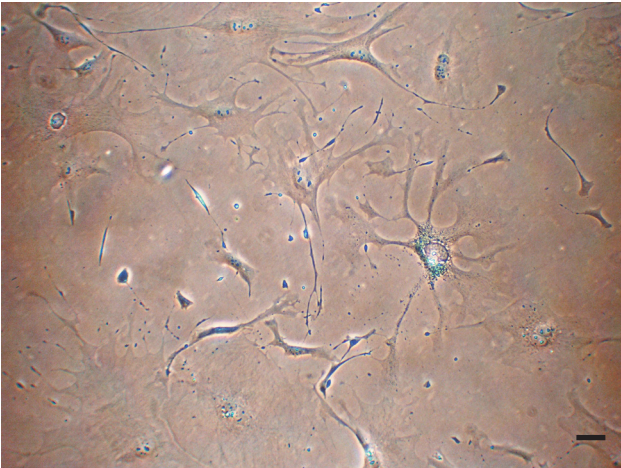

LiCl (20mM)

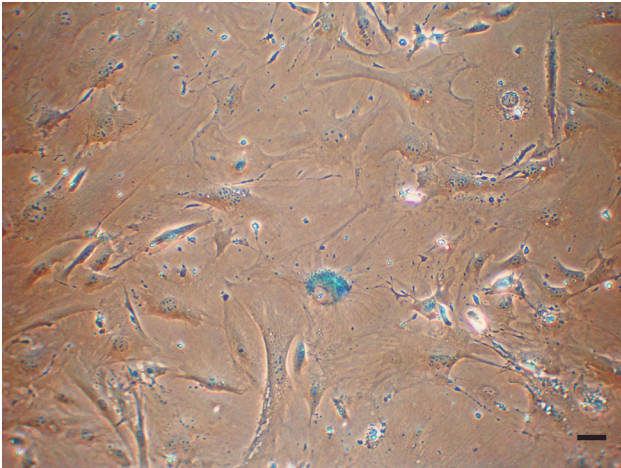

Supplement: MOESM1 [file 8394190]
